# Supplementary material
Source: PubMed Central journal article supplement (PMC2435131)
Supplement: emboj200896s1.pdf [file emboj200896s1.pdf]

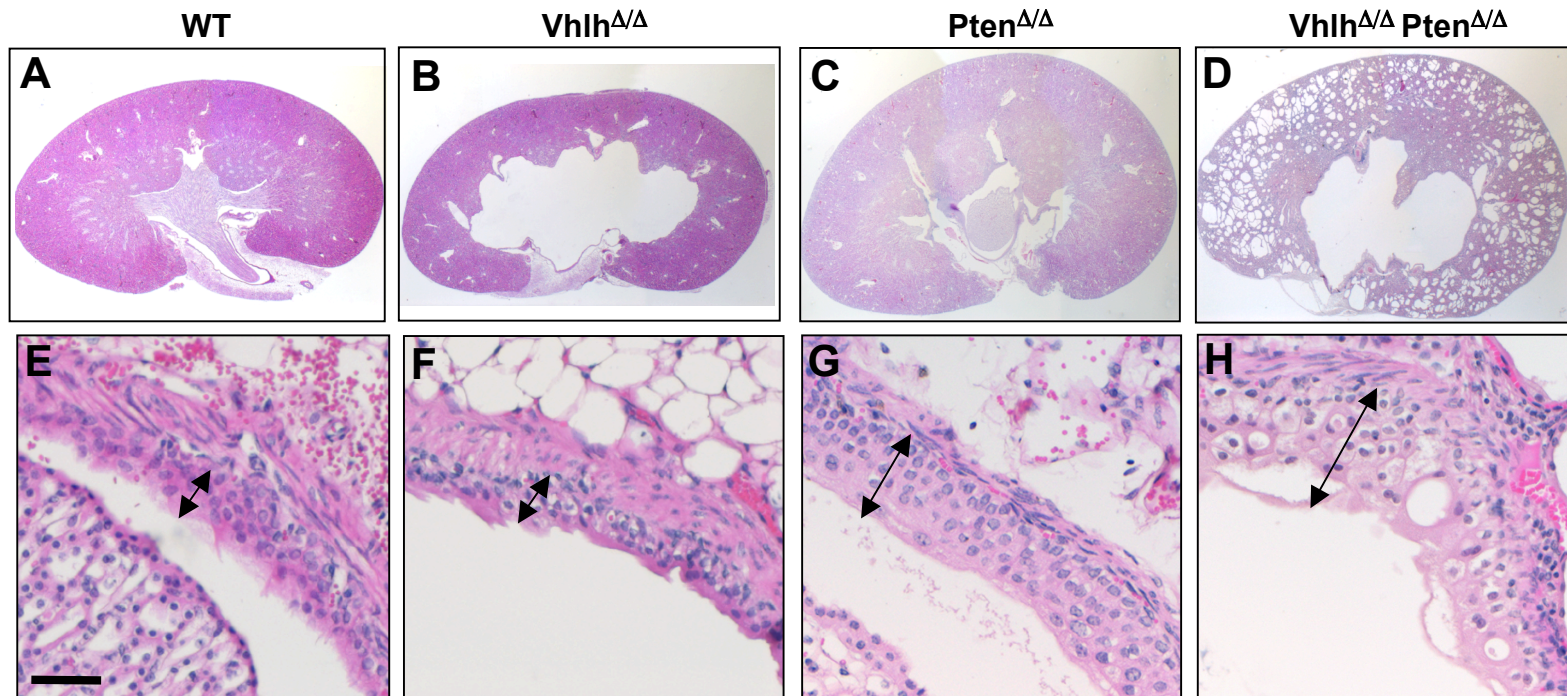

**Supplementary Figure 1** Hydronephrosis, cyst formation and urothelial hyperplasia.

(A-D) Histological appearance of longitudinal midline sections of kidneys from 11 week-old WT, Vhlh<sup>Δ/Δ</sup>, Pten<sup>Δ/Δ</sup> and Vhlh<sup>Δ/Δ</sup>Pten<sup>Δ/Δ</sup> mice.

(E-H) The urothelium of the renal pelvis is indicated by lines with double arrowheads. Bar = 50μm
